# Supplementary material
Source: publisher figshare collection journal article supplement (https://acs.figshare.com/ndownloader/files/4390972)
Supplement: Supplementary file 1 [file 4390972]

 
data_ja64
 
_audit_creation_method            SHELXL-97
_chemical_name_systematic
;
 ?
;
_chemical_name_common             ?
_chemical_melting_point           ?
_chemical_formula_moiety          ?
_chemical_formula_sum
 'C36 H43 F5 N2 O Sn'
_chemical_formula_weight          733.41
 
loop_
 _atom_type_symbol
 _atom_type_description
 _atom_type_scat_dispersion_real
 _atom_type_scat_dispersion_imag
 _atom_type_scat_source
 'C'  'C'   0.0033   0.0016
 'International Tables Vol C Tables 4.2.6.8 and 6.1.1.4'
 'H'  'H'   0.0000   0.0000
 'International Tables Vol C Tables 4.2.6.8 and 6.1.1.4'
 'F'  'F'   0.0171   0.0103
 'International Tables Vol C Tables 4.2.6.8 and 6.1.1.4'
 'N'  'N'   0.0061   0.0033
 'International Tables Vol C Tables 4.2.6.8 and 6.1.1.4'
 'O'  'O'   0.0106   0.0060
 'International Tables Vol C Tables 4.2.6.8 and 6.1.1.4'
 'Sn'  'Sn'  -0.6537   1.4246
 'International Tables Vol C Tables 4.2.6.8 and 6.1.1.4'
 
_symmetry_cell_setting            triclinic
_symmetry_space_group_name_H-M    P-1
 
loop_
 _symmetry_equiv_pos_as_xyz
 'x, y, z'
 '-x, -y, -z'
 
_cell_length_a                    12.074(2)
_cell_length_b                    12.398(3)
_cell_length_c                    12.821(3)
_cell_angle_alpha                 82.25(3)
_cell_angle_beta                  72.91(3)
_cell_angle_gamma                 71.68(3)
_cell_volume                      1739.6(7)
_cell_formula_units_Z             2
_cell_measurement_temperature     133(2)
_cell_measurement_reflns_used     16667
_cell_measurement_theta_min       3.32
_cell_measurement_theta_max       54.06
 
_exptl_crystal_description        block
_exptl_crystal_colour             yellow
_exptl_crystal_size_max           0.24
_exptl_crystal_size_mid           0.19
_exptl_crystal_size_min           0.15
_exptl_crystal_density_meas       ?
_exptl_crystal_density_diffrn     1.400
_exptl_crystal_density_method     'not measured'
_exptl_crystal_F_000              752
_exptl_absorpt_coefficient_mu     0.791
_exptl_absorpt_correction_type    numerical
_exptl_absorpt_correction_T_min   0.8032
_exptl_absorpt_correction_T_max   0.9064
_exptl_absorpt_process_details    'face indexed'
 
_exptl_special_details
;
 ?
;
 
_diffrn_ambient_temperature       133(2)
_diffrn_radiation_wavelength      0.71073
_diffrn_radiation_type            MoK\a
_diffrn_radiation_source          'fine-focus sealed tube'
_diffrn_radiation_monochromator   graphite
_diffrn_measurement_device_type   IPDSII
_diffrn_measurement_method        ?
_diffrn_detector_area_resol_mean  ?
_diffrn_standards_number          ?
_diffrn_standards_interval_count  ?
_diffrn_standards_interval_time   ?
_diffrn_standards_decay_%         ?
_diffrn_reflns_number             16667
_diffrn_reflns_av_R_equivalents   0.0304
_diffrn_reflns_av_sigmaI/netI     0.0301
_diffrn_reflns_limit_h_min        -15
_diffrn_reflns_limit_h_max        15
_diffrn_reflns_limit_k_min        -15
_diffrn_reflns_limit_k_max        15
_diffrn_reflns_limit_l_min        -16
_diffrn_reflns_limit_l_max        16
_diffrn_reflns_theta_min          1.66
_diffrn_reflns_theta_max          27.03
_reflns_number_total              7535
_reflns_number_gt                 6724
_reflns_threshold_expression      >2\s(I)
 
_computing_data_collection        ?
_computing_cell_refinement        ?
_computing_data_reduction         ?
_computing_structure_solution     ?
_computing_structure_refinement   'SHELXL-97 (Sheldrick, 2008)'
_computing_molecular_graphics     ?
_computing_publication_material   ?
 
_refine_special_details
;
 Refinement of F^2^ against ALL reflections.  The weighted R-factor wR and
 goodness of fit S are based on F^2^, conventional R-factors R are based
 on F, with F set to zero for negative F^2^. The threshold expression of
 F^2^ > 2\s(F^2^) is used only for calculating R-factors(gt) etc. and is
 not relevant to the choice of reflections for refinement.  R-factors based
 on F^2^ are statistically about twice as large as those based on F, and R-
 factors based on ALL data will be even larger.
;
 
_refine_ls_structure_factor_coef  Fsqd
_refine_ls_matrix_type            full
_refine_ls_weighting_scheme       calc
_refine_ls_weighting_details
 'calc w=1/[\s^2^(Fo^2^)+(0.0370P)^2^+0.0000P] where P=(Fo^2^+2Fc^2^)/3'
_atom_sites_solution_primary      direct
_atom_sites_solution_secondary    difmap
_atom_sites_solution_hydrogens    geom
_refine_ls_hydrogen_treatment     constr
_refine_ls_extinction_method      none
_refine_ls_extinction_coef        ?
_refine_ls_number_reflns          7535
_refine_ls_number_parameters      416
_refine_ls_number_restraints      0
_refine_ls_R_factor_all           0.0286
_refine_ls_R_factor_gt            0.0233
_refine_ls_wR_factor_ref          0.0568
_refine_ls_wR_factor_gt           0.0556
_refine_ls_goodness_of_fit_ref    0.997
_refine_ls_restrained_S_all       0.997
_refine_ls_shift/su_max           0.002
_refine_ls_shift/su_mean          0.000
 
loop_
 _atom_site_label
 _atom_site_type_symbol
 _atom_site_fract_x
 _atom_site_fract_y
 _atom_site_fract_z
 _atom_site_U_iso_or_equiv
 _atom_site_adp_type
 _atom_site_occupancy
 _atom_site_symmetry_multiplicity
 _atom_site_calc_flag
 _atom_site_refinement_flags
 _atom_site_disorder_assembly
 _atom_site_disorder_group
Sn1 Sn 0.408306(10) 0.686145(9) 0.234185(9) 0.01902(4) Uani 1 1 d . . .
F2 F 0.25462(14) 0.36057(10) 0.02050(11) 0.0468(3) Uani 1 1 d . . .
F1 F 0.37625(10) 0.48369(9) 0.07598(9) 0.0327(2) Uani 1 1 d . . .
F3 F 0.09477(14) 0.45987(13) -0.09952(12) 0.0531(4) Uani 1 1 d . . .
F4 F 0.05611(14) 0.68264(13) -0.16393(12) 0.0545(4) Uani 1 1 d . . .
F5 F 0.17963(13) 0.80563(10) -0.11256(10) 0.0434(3) Uani 1 1 d . . .
O1 O 0.29993(11) 0.73543(10) 0.13132(10) 0.0241(2) Uani 1 1 d . . .
N1 N 0.33160(12) 0.85099(11) 0.31022(11) 0.0197(3) Uani 1 1 d . . .
N3 N 0.27015(12) 0.63690(11) 0.36894(11) 0.0199(3) Uani 1 1 d . . .
C1 C 0.34876(17) 0.71554(15) 0.01934(14) 0.0261(4) Uani 1 1 d . . .
H1A H 0.4357 0.6725 0.0050 0.031 Uiso 1 1 calc R . .
H1B H 0.3418 0.7890 -0.0233 0.031 Uiso 1 1 calc R . .
C2 C 0.28161(15) 0.64859(14) -0.01554(13) 0.0219(3) Uani 1 1 d . . .
C3 C 0.19962(18) 0.69552(15) -0.07694(15) 0.0283(4) Uani 1 1 d . . .
C4 C 0.13606(18) 0.63391(18) -0.10487(16) 0.0346(4) Uani 1 1 d . . .
C5 C 0.15504(19) 0.52095(18) -0.07208(16) 0.0345(4) Uani 1 1 d . . .
C6 C 0.23609(19) 0.47093(15) -0.01096(15) 0.0307(4) Uani 1 1 d . . .
C7 C 0.29748(16) 0.53447(14) 0.01656(14) 0.0241(3) Uani 1 1 d . . .
C8 C 0.23479(15) 0.54363(14) 0.34631(13) 0.0206(3) Uani 1 1 d . . .
C9 C 0.12604(15) 0.56712(14) 0.31674(14) 0.0222(3) Uani 1 1 d . . .
C10 C 0.09974(17) 0.47738(16) 0.28341(15) 0.0288(4) Uani 1 1 d . . .
H10 H 0.0270 0.4916 0.2625 0.035 Uiso 1 1 calc R . .
C11 C 0.17807(19) 0.36787(16) 0.28039(16) 0.0335(4) Uani 1 1 d . . .
H11 H 0.1595 0.3080 0.2563 0.040 Uiso 1 1 calc R . .
C12 C 0.28258(19) 0.34599(15) 0.31224(16) 0.0320(4) Uani 1 1 d . . .
H12 H 0.3347 0.2704 0.3112 0.038 Uiso 1 1 calc R . .
C13 C 0.31400(16) 0.43222(14) 0.34602(14) 0.0251(4) Uani 1 1 d . . .
C14 C 0.03480(16) 0.68535(15) 0.32334(15) 0.0265(4) Uani 1 1 d . . .
H14 H 0.0681 0.7375 0.3499 0.032 Uiso 1 1 calc R . .
C15 C 0.01210(18) 0.73412(17) 0.21337(16) 0.0325(4) Uani 1 1 d . . .
H15A H 0.0881 0.7408 0.1620 0.049 Uiso 1 1 calc R . .
H15B H -0.0475 0.8094 0.2226 0.049 Uiso 1 1 calc R . .
H15C H -0.0189 0.6835 0.1847 0.049 Uiso 1 1 calc R . .
C16 C -0.0865(2) 0.6831(2) 0.40636(19) 0.0467(6) Uani 1 1 d . . .
H16A H -0.1399 0.7610 0.4173 0.070 Uiso 1 1 calc R . .
H16B H -0.0716 0.6482 0.4761 0.070 Uiso 1 1 calc R . .
H16C H -0.1251 0.6388 0.3784 0.070 Uiso 1 1 calc R . .
C17 C 0.42928(17) 0.40407(16) 0.38268(16) 0.0315(4) Uani 1 1 d . . .
H17 H 0.4370 0.4767 0.4012 0.038 Uiso 1 1 calc R . .
C18 C 0.5418(2) 0.3517(2) 0.2914(2) 0.0477(6) Uani 1 1 d . . .
H18A H 0.5381 0.2785 0.2740 0.072 Uiso 1 1 calc R . .
H18B H 0.6146 0.3400 0.3157 0.072 Uiso 1 1 calc R . .
H18C H 0.5444 0.4032 0.2262 0.072 Uiso 1 1 calc R . .
C19 C 0.4243(2) 0.3240(2) 0.4854(2) 0.0497(6) Uani 1 1 d . . .
H19A H 0.3541 0.3593 0.5443 0.075 Uiso 1 1 calc R . .
H19B H 0.4985 0.3098 0.5083 0.075 Uiso 1 1 calc R . .
H19C H 0.4172 0.2518 0.4692 0.075 Uiso 1 1 calc R . .
C20 C 0.1578(2) 0.61964(18) 0.56052(16) 0.0370(5) Uani 1 1 d . . .
H20A H 0.0762 0.6324 0.5528 0.056 Uiso 1 1 calc R . .
H20B H 0.1521 0.6488 0.6298 0.056 Uiso 1 1 calc R . .
H20C H 0.1999 0.5380 0.5597 0.056 Uiso 1 1 calc R . .
C21 C 0.22745(15) 0.68095(15) 0.46677(14) 0.0234(3) Uani 1 1 d . . .
C22 C 0.24129(16) 0.78226(15) 0.48987(14) 0.0253(4) Uani 1 1 d . . .
H22 H 0.2214 0.7965 0.5651 0.030 Uiso 1 1 calc R . .
C23 C 0.28077(15) 0.86551(15) 0.41634(14) 0.0231(3) Uani 1 1 d . . .
C24 C 0.2646(2) 0.97657(17) 0.46313(16) 0.0340(4) Uani 1 1 d . . .
H24A H 0.3426 0.9790 0.4696 0.051 Uiso 1 1 calc R . .
H24B H 0.2065 0.9828 0.5354 0.051 Uiso 1 1 calc R . .
H24C H 0.2341 1.0400 0.4147 0.051 Uiso 1 1 calc R . .
C25 C 0.35868(15) 0.94437(13) 0.23788(13) 0.0208(3) Uani 1 1 d . . .
C26 C 0.47247(16) 0.96258(14) 0.21910(14) 0.0230(3) Uani 1 1 d . . .
C27 C 0.49701(17) 1.05167(16) 0.14593(16) 0.0293(4) Uani 1 1 d . . .
H27 H 0.5735 1.0651 0.1313 0.035 Uiso 1 1 calc R . .
C28 C 0.41247(19) 1.12048(16) 0.09450(17) 0.0325(4) Uani 1 1 d . . .
H28 H 0.4304 1.1815 0.0461 0.039 Uiso 1 1 calc R . .
C29 C 0.30151(18) 1.10074(15) 0.11325(16) 0.0291(4) Uani 1 1 d . . .
H29 H 0.2439 1.1489 0.0776 0.035 Uiso 1 1 calc R . .
C30 C 0.27257(16) 1.01153(14) 0.18342(15) 0.0237(3) Uani 1 1 d . . .
C31 C 0.56791(16) 0.88945(15) 0.27425(15) 0.0264(4) Uani 1 1 d . . .
H31 H 0.5312 0.8359 0.3284 0.032 Uiso 1 1 calc R . .
C32 C 0.67784(18) 0.81827(18) 0.19235(18) 0.0354(4) Uani 1 1 d . . .
H32A H 0.6517 0.7711 0.1544 0.053 Uiso 1 1 calc R . .
H32B H 0.7357 0.7692 0.2311 0.053 Uiso 1 1 calc R . .
H32C H 0.7166 0.8688 0.1390 0.053 Uiso 1 1 calc R . .
C33 C 0.6091(2) 0.96037(19) 0.33648(19) 0.0396(5) Uani 1 1 d . . .
H33A H 0.6501 1.0104 0.2846 0.059 Uiso 1 1 calc R . .
H33B H 0.6651 0.9095 0.3762 0.059 Uiso 1 1 calc R . .
H33C H 0.5385 1.0065 0.3884 0.059 Uiso 1 1 calc R . .
C34 C 0.15129(16) 0.98891(15) 0.20067(16) 0.0273(4) Uani 1 1 d . . .
H34 H 0.1620 0.9069 0.2242 0.033 Uiso 1 1 calc R . .
C35 C 0.11074(19) 1.00912(18) 0.09514(19) 0.0377(5) Uani 1 1 d . . .
H35A H 0.0909 1.0905 0.0741 0.057 Uiso 1 1 calc R . .
H35B H 0.0391 0.9830 0.1072 0.057 Uiso 1 1 calc R . .
H35C H 0.1763 0.9668 0.0367 0.057 Uiso 1 1 calc R . .
C36 C 0.05163(19) 1.0592(2) 0.29117(19) 0.0414(5) Uani 1 1 d . . .
H36A H 0.0716 1.0359 0.3612 0.062 Uiso 1 1 calc R . .
H36B H -0.0258 1.0466 0.2955 0.062 Uiso 1 1 calc R . .
H36C H 0.0454 1.1401 0.2747 0.062 Uiso 1 1 calc R . .
 
loop_
 _atom_site_aniso_label
 _atom_site_aniso_U_11
 _atom_site_aniso_U_22
 _atom_site_aniso_U_33
 _atom_site_aniso_U_23
 _atom_site_aniso_U_13
 _atom_site_aniso_U_12
Sn1 0.01674(6) 0.01918(6) 0.02081(6) -0.00094(4) -0.00308(4) -0.00654(4)
F2 0.0787(10) 0.0248(6) 0.0417(7) -0.0003(5) -0.0167(7) -0.0216(6)
F1 0.0359(6) 0.0284(5) 0.0309(6) 0.0023(4) -0.0151(5) -0.0011(4)
F3 0.0609(9) 0.0624(9) 0.0540(8) -0.0183(7) -0.0205(7) -0.0317(7)
F4 0.0567(9) 0.0596(8) 0.0546(8) -0.0120(7) -0.0411(7) 0.0012(7)
F5 0.0641(8) 0.0250(5) 0.0407(7) 0.0044(5) -0.0276(6) -0.0021(5)
O1 0.0230(6) 0.0282(6) 0.0210(6) -0.0056(5) -0.0055(5) -0.0056(5)
N1 0.0211(7) 0.0196(6) 0.0202(7) -0.0006(5) -0.0059(5) -0.0084(5)
N3 0.0188(6) 0.0210(6) 0.0209(7) 0.0005(5) -0.0052(5) -0.0077(5)
C1 0.0296(9) 0.0279(8) 0.0217(8) -0.0008(7) -0.0046(7) -0.0117(7)
C2 0.0237(8) 0.0232(8) 0.0169(7) -0.0017(6) -0.0030(6) -0.0062(6)
C3 0.0352(10) 0.0230(8) 0.0229(9) -0.0023(7) -0.0088(7) -0.0016(7)
C4 0.0339(10) 0.0417(11) 0.0288(10) -0.0085(8) -0.0165(8) -0.0015(8)
C5 0.0388(11) 0.0403(11) 0.0305(10) -0.0124(8) -0.0094(8) -0.0152(9)
C6 0.0413(11) 0.0229(8) 0.0268(9) -0.0039(7) -0.0047(8) -0.0106(7)
C7 0.0255(8) 0.0240(8) 0.0194(8) -0.0018(6) -0.0054(7) -0.0026(6)
C8 0.0219(8) 0.0211(7) 0.0181(7) 0.0015(6) -0.0023(6) -0.0094(6)
C9 0.0232(8) 0.0239(8) 0.0200(8) 0.0006(6) -0.0036(6) -0.0101(6)
C10 0.0311(9) 0.0347(9) 0.0251(9) -0.0007(7) -0.0062(7) -0.0173(8)
C11 0.0461(12) 0.0302(9) 0.0279(9) -0.0051(7) -0.0017(8) -0.0222(8)
C12 0.0396(11) 0.0199(8) 0.0299(10) -0.0005(7) -0.0001(8) -0.0086(7)
C13 0.0253(8) 0.0226(8) 0.0222(8) 0.0018(6) -0.0004(7) -0.0062(7)
C14 0.0225(8) 0.0277(8) 0.0299(9) -0.0014(7) -0.0083(7) -0.0068(7)
C15 0.0278(9) 0.0368(10) 0.0311(10) 0.0037(8) -0.0089(8) -0.0082(8)
C16 0.0319(11) 0.0517(13) 0.0378(12) 0.0070(10) 0.0024(9) -0.0011(9)
C17 0.0251(9) 0.0294(9) 0.0321(10) 0.0062(7) -0.0041(7) -0.0034(7)
C18 0.0290(11) 0.0485(13) 0.0476(13) 0.0039(10) 0.0003(10) 0.0014(9)
C19 0.0343(11) 0.0619(15) 0.0425(13) 0.0230(11) -0.0114(10) -0.0092(10)
C20 0.0476(12) 0.0423(11) 0.0241(9) 0.0003(8) -0.0001(9) -0.0265(9)
C21 0.0230(8) 0.0283(8) 0.0194(8) 0.0020(6) -0.0050(6) -0.0102(7)
C22 0.0286(9) 0.0327(9) 0.0178(8) -0.0024(7) -0.0049(7) -0.0137(7)
C23 0.0221(8) 0.0272(8) 0.0232(8) -0.0036(7) -0.0068(7) -0.0099(6)
C24 0.0435(11) 0.0343(10) 0.0284(10) -0.0095(8) -0.0039(8) -0.0190(9)
C25 0.0255(8) 0.0179(7) 0.0202(8) -0.0024(6) -0.0051(6) -0.0082(6)
C26 0.0272(8) 0.0236(8) 0.0222(8) -0.0017(6) -0.0075(7) -0.0117(7)
C27 0.0301(9) 0.0308(9) 0.0308(9) 0.0017(7) -0.0074(8) -0.0161(7)
C28 0.0412(11) 0.0251(8) 0.0343(10) 0.0068(7) -0.0113(8) -0.0162(8)
C29 0.0345(10) 0.0220(8) 0.0321(10) 0.0013(7) -0.0130(8) -0.0073(7)
C30 0.0252(8) 0.0185(7) 0.0271(9) -0.0031(6) -0.0065(7) -0.0056(6)
C31 0.0277(9) 0.0308(9) 0.0272(9) 0.0027(7) -0.0123(7) -0.0147(7)
C32 0.0257(9) 0.0429(11) 0.0389(11) -0.0033(9) -0.0118(8) -0.0083(8)
C33 0.0459(12) 0.0462(12) 0.0402(11) -0.0020(9) -0.0222(10) -0.0219(10)
C34 0.0238(8) 0.0217(8) 0.0364(10) -0.0001(7) -0.0106(7) -0.0048(7)
C35 0.0316(10) 0.0400(11) 0.0460(12) -0.0047(9) -0.0180(9) -0.0083(8)
C36 0.0268(10) 0.0478(12) 0.0431(12) -0.0055(10) -0.0052(9) -0.0044(9)
 
_geom_special_details
;
 All s.u.'s (except the s.u. in the dihedral angle between two l.s. planes)
 are estimated using the full covariance matrix.  The cell s.u.'s are taken
 into account individually in the estimation of s.u.'s in distances, angles
 and torsion angles; correlations between s.u.'s in cell parameters are only
 used when they are defined by crystal symmetry.  An approximate (isotropic)
 treatment of cell s.u.'s is used for estimating s.u.'s involving l.s. planes.
;
 
loop_
 _geom_bond_atom_site_label_1
 _geom_bond_atom_site_label_2
 _geom_bond_distance
 _geom_bond_site_symmetry_2
 _geom_bond_publ_flag
Sn1 O1 2.0296(14) . ?
Sn1 N1 2.1913(16) . ?
Sn1 N3 2.1914(15) . ?
F2 C6 1.340(2) . ?
F1 C7 1.342(2) . ?
F3 C5 1.340(2) . ?
F4 C4 1.345(2) . ?
F5 C3 1.349(2) . ?
O1 C1 1.406(2) . ?
N1 C23 1.329(2) . ?
N1 C25 1.441(2) . ?
N3 C21 1.329(2) . ?
N3 C8 1.441(2) . ?
C1 C2 1.511(2) . ?
C2 C3 1.382(3) . ?
C2 C7 1.388(2) . ?
C3 C4 1.380(3) . ?
C4 C5 1.373(3) . ?
C5 C6 1.376(3) . ?
C6 C7 1.375(3) . ?
C8 C9 1.405(2) . ?
C8 C13 1.411(2) . ?
C9 C10 1.397(2) . ?
C9 C14 1.527(2) . ?
C10 C11 1.387(3) . ?
C11 C12 1.375(3) . ?
C12 C13 1.397(3) . ?
C13 C17 1.521(3) . ?
C14 C15 1.524(3) . ?
C14 C16 1.543(3) . ?
C17 C18 1.533(3) . ?
C17 C19 1.537(3) . ?
C20 C21 1.514(2) . ?
C21 C22 1.398(2) . ?
C22 C23 1.401(2) . ?
C23 C24 1.510(2) . ?
C25 C26 1.408(2) . ?
C25 C30 1.410(3) . ?
C26 C27 1.397(2) . ?
C26 C31 1.516(3) . ?
C27 C28 1.379(3) . ?
C28 C29 1.383(3) . ?
C29 C30 1.394(2) . ?
C30 C34 1.524(2) . ?
C31 C32 1.529(3) . ?
C31 C33 1.535(3) . ?
C34 C36 1.532(3) . ?
C34 C35 1.534(3) . ?
 
loop_
 _geom_angle_atom_site_label_1
 _geom_angle_atom_site_label_2
 _geom_angle_atom_site_label_3
 _geom_angle
 _geom_angle_site_symmetry_1
 _geom_angle_site_symmetry_3
 _geom_angle_publ_flag
O1 Sn1 N1 91.84(6) . . ?
O1 Sn1 N3 93.93(5) . . ?
N1 Sn1 N3 83.60(6) . . ?
C1 O1 Sn1 120.20(11) . . ?
C23 N1 C25 120.46(14) . . ?
C23 N1 Sn1 124.96(11) . . ?
C25 N1 Sn1 113.81(10) . . ?
C21 N3 C8 121.19(14) . . ?
C21 N3 Sn1 124.60(11) . . ?
C8 N3 Sn1 114.01(10) . . ?
O1 C1 C2 109.76(14) . . ?
C3 C2 C7 116.06(17) . . ?
C3 C2 C1 123.49(16) . . ?
C7 C2 C1 120.41(16) . . ?
F5 C3 C4 117.37(18) . . ?
F5 C3 C2 119.98(17) . . ?
C4 C3 C2 122.65(17) . . ?
F4 C4 C5 119.52(19) . . ?
F4 C4 C3 121.05(19) . . ?
C5 C4 C3 119.43(19) . . ?
F3 C5 C4 120.0(2) . . ?
F3 C5 C6 120.23(19) . . ?
C4 C5 C6 119.73(18) . . ?
F2 C6 C7 120.82(18) . . ?
F2 C6 C5 119.50(18) . . ?
C7 C6 C5 119.67(17) . . ?
F1 C7 C6 118.55(16) . . ?
F1 C7 C2 119.00(16) . . ?
C6 C7 C2 122.44(17) . . ?
C9 C8 C13 121.41(16) . . ?
C9 C8 N3 118.91(14) . . ?
C13 C8 N3 119.49(15) . . ?
C10 C9 C8 118.13(16) . . ?
C10 C9 C14 119.32(16) . . ?
C8 C9 C14 122.52(15) . . ?
C11 C10 C9 121.08(18) . . ?
C12 C11 C10 119.96(17) . . ?
C11 C12 C13 121.60(17) . . ?
C12 C13 C8 117.78(17) . . ?
C12 C13 C17 119.96(17) . . ?
C8 C13 C17 122.24(17) . . ?
C15 C14 C9 113.05(16) . . ?
C15 C14 C16 109.36(17) . . ?
C9 C14 C16 110.54(16) . . ?
C13 C17 C18 111.54(18) . . ?
C13 C17 C19 111.59(17) . . ?
C18 C17 C19 109.90(18) . . ?
N3 C21 C22 124.33(15) . . ?
N3 C21 C20 118.92(16) . . ?
C22 C21 C20 116.74(16) . . ?
C21 C22 C23 128.36(16) . . ?
N1 C23 C22 123.74(15) . . ?
N1 C23 C24 119.51(16) . . ?
C22 C23 C24 116.75(16) . . ?
C26 C25 C30 121.70(15) . . ?
C26 C25 N1 119.32(15) . . ?
C30 C25 N1 118.90(15) . . ?
C27 C26 C25 117.77(17) . . ?
C27 C26 C31 119.53(16) . . ?
C25 C26 C31 122.70(15) . . ?
C28 C27 C26 121.33(17) . . ?
C27 C28 C29 120.10(17) . . ?
C28 C29 C30 121.35(18) . . ?
C29 C30 C25 117.69(16) . . ?
C29 C30 C34 120.66(17) . . ?
C25 C30 C34 121.64(15) . . ?
C26 C31 C32 111.61(16) . . ?
C26 C31 C33 112.14(16) . . ?
C32 C31 C33 109.58(16) . . ?
C30 C34 C36 112.25(16) . . ?
C30 C34 C35 112.22(16) . . ?
C36 C34 C35 109.90(17) . . ?
 
loop_
 _geom_torsion_atom_site_label_1
 _geom_torsion_atom_site_label_2
 _geom_torsion_atom_site_label_3
 _geom_torsion_atom_site_label_4
 _geom_torsion
 _geom_torsion_site_symmetry_1
 _geom_torsion_site_symmetry_2
 _geom_torsion_site_symmetry_3
 _geom_torsion_site_symmetry_4
 _geom_torsion_publ_flag
N1 Sn1 O1 C1 133.09(12) . . . . ?
N3 Sn1 O1 C1 -143.20(12) . . . . ?
O1 Sn1 N1 C23 123.79(14) . . . . ?
N3 Sn1 N1 C23 30.04(14) . . . . ?
O1 Sn1 N1 C25 -66.31(12) . . . . ?
N3 Sn1 N1 C25 -160.06(12) . . . . ?
O1 Sn1 N3 C21 -121.01(14) . . . . ?
N1 Sn1 N3 C21 -29.60(14) . . . . ?
O1 Sn1 N3 C8 64.00(12) . . . . ?
N1 Sn1 N3 C8 155.41(12) . . . . ?
Sn1 O1 C1 C2 124.28(13) . . . . ?
O1 C1 C2 C3 105.98(19) . . . . ?
O1 C1 C2 C7 -72.0(2) . . . . ?
C7 C2 C3 F5 -179.29(15) . . . . ?
C1 C2 C3 F5 2.6(3) . . . . ?
C7 C2 C3 C4 0.3(3) . . . . ?
C1 C2 C3 C4 -177.72(17) . . . . ?
F5 C3 C4 F4 -1.0(3) . . . . ?
C2 C3 C4 F4 179.39(17) . . . . ?
F5 C3 C4 C5 178.85(17) . . . . ?
C2 C3 C4 C5 -0.8(3) . . . . ?
F4 C4 C5 F3 0.4(3) . . . . ?
C3 C4 C5 F3 -179.36(18) . . . . ?
F4 C4 C5 C6 -179.53(18) . . . . ?
C3 C4 C5 C6 0.7(3) . . . . ?
F3 C5 C6 F2 0.3(3) . . . . ?
C4 C5 C6 F2 -179.75(18) . . . . ?
F3 C5 C6 C7 179.92(17) . . . . ?
C4 C5 C6 C7 -0.1(3) . . . . ?
F2 C6 C7 F1 -0.2(3) . . . . ?
C5 C6 C7 F1 -179.84(16) . . . . ?
F2 C6 C7 C2 179.29(16) . . . . ?
C5 C6 C7 C2 -0.3(3) . . . . ?
C3 C2 C7 F1 179.72(15) . . . . ?
C1 C2 C7 F1 -2.2(2) . . . . ?
C3 C2 C7 C6 0.2(2) . . . . ?
C1 C2 C7 C6 178.36(16) . . . . ?
C21 N3 C8 C9 83.8(2) . . . . ?
Sn1 N3 C8 C9 -100.98(15) . . . . ?
C21 N3 C8 C13 -101.03(19) . . . . ?
Sn1 N3 C8 C13 74.15(17) . . . . ?
C13 C8 C9 C10 -2.0(2) . . . . ?
N3 C8 C9 C10 173.04(15) . . . . ?
C13 C8 C9 C14 175.97(15) . . . . ?
N3 C8 C9 C14 -9.0(2) . . . . ?
C8 C9 C10 C11 0.5(3) . . . . ?
C14 C9 C10 C11 -177.50(17) . . . . ?
C9 C10 C11 C12 1.1(3) . . . . ?
C10 C11 C12 C13 -1.3(3) . . . . ?
C11 C12 C13 C8 -0.1(3) . . . . ?
C11 C12 C13 C17 178.84(17) . . . . ?
C9 C8 C13 C12 1.8(2) . . . . ?
N3 C8 C13 C12 -173.21(15) . . . . ?
C9 C8 C13 C17 -177.15(16) . . . . ?
N3 C8 C13 C17 7.8(2) . . . . ?
C10 C9 C14 C15 -61.9(2) . . . . ?
C8 C9 C14 C15 120.11(18) . . . . ?
C10 C9 C14 C16 61.0(2) . . . . ?
C8 C9 C14 C16 -116.9(2) . . . . ?
C12 C13 C17 C18 60.0(2) . . . . ?
C8 C13 C17 C18 -121.09(19) . . . . ?
C12 C13 C17 C19 -63.4(2) . . . . ?
C8 C13 C17 C19 115.6(2) . . . . ?
C8 N3 C21 C22 -168.98(17) . . . . ?
Sn1 N3 C21 C22 16.4(2) . . . . ?
C8 N3 C21 C20 10.4(3) . . . . ?
Sn1 N3 C21 C20 -164.28(14) . . . . ?
N3 C21 C22 C23 12.3(3) . . . . ?
C20 C21 C22 C23 -167.04(19) . . . . ?
C25 N1 C23 C22 173.68(17) . . . . ?
Sn1 N1 C23 C22 -17.0(2) . . . . ?
C25 N1 C23 C24 -7.0(2) . . . . ?
Sn1 N1 C23 C24 162.26(14) . . . . ?
C21 C22 C23 N1 -12.0(3) . . . . ?
C21 C22 C23 C24 168.72(19) . . . . ?
C23 N1 C25 C26 90.1(2) . . . . ?
Sn1 N1 C25 C26 -80.26(17) . . . . ?
C23 N1 C25 C30 -93.1(2) . . . . ?
Sn1 N1 C25 C30 96.50(15) . . . . ?
C30 C25 C26 C27 1.4(2) . . . . ?
N1 C25 C26 C27 178.06(15) . . . . ?
C30 C25 C26 C31 -178.25(15) . . . . ?
N1 C25 C26 C31 -1.6(2) . . . . ?
C25 C26 C27 C28 0.7(3) . . . . ?
C31 C26 C27 C28 -179.67(17) . . . . ?
C26 C27 C28 C29 -1.2(3) . . . . ?
C27 C28 C29 C30 -0.3(3) . . . . ?
C28 C29 C30 C25 2.2(3) . . . . ?
C28 C29 C30 C34 -178.25(18) . . . . ?
C26 C25 C30 C29 -2.8(2) . . . . ?
N1 C25 C30 C29 -179.49(15) . . . . ?
C26 C25 C30 C34 177.70(16) . . . . ?
N1 C25 C30 C34 1.0(2) . . . . ?
C27 C26 C31 C32 -67.3(2) . . . . ?
C25 C26 C31 C32 112.37(19) . . . . ?
C27 C26 C31 C33 56.1(2) . . . . ?
C25 C26 C31 C33 -124.24(19) . . . . ?
C29 C30 C34 C36 -86.8(2) . . . . ?
C25 C30 C34 C36 92.6(2) . . . . ?
C29 C30 C34 C35 37.5(2) . . . . ?
C25 C30 C34 C35 -143.01(17) . . . . ?
 
_diffrn_measured_fraction_theta_max    0.988
_diffrn_reflns_theta_full              27.03
_diffrn_measured_fraction_theta_full   0.988
_refine_diff_density_max    0.964
_refine_diff_density_min   -0.341
_refine_diff_density_rms    0.060

 
data_ppo22
 
_audit_creation_method            SHELXL-97
_chemical_name_systematic
;
 ?
;
_chemical_name_common             ?
_chemical_melting_point           ?
_chemical_formula_moiety          ?
_chemical_formula_sum
 'C35 H41 F5 N2 Sn'
_chemical_formula_weight          703.39
 
loop_
 _atom_type_symbol
 _atom_type_description
 _atom_type_scat_dispersion_real
 _atom_type_scat_dispersion_imag
 _atom_type_scat_source
 'C'  'C'   0.0033   0.0016
 'International Tables Vol C Tables 4.2.6.8 and 6.1.1.4'
 'H'  'H'   0.0000   0.0000
 'International Tables Vol C Tables 4.2.6.8 and 6.1.1.4'
 'N'  'N'   0.0061   0.0033
 'International Tables Vol C Tables 4.2.6.8 and 6.1.1.4'
 'F'  'F'   0.0171   0.0103
 'International Tables Vol C Tables 4.2.6.8 and 6.1.1.4'
 'Sn'  'Sn'  -0.6537   1.4246
 'International Tables Vol C Tables 4.2.6.8 and 6.1.1.4'
 
_symmetry_cell_setting            monoclinic
_symmetry_space_group_name_H-M    P21/n
 
loop_
 _symmetry_equiv_pos_as_xyz
 'x, y, z'
 '-x+1/2, y+1/2, -z+1/2'
 '-x, -y, -z'
 'x-1/2, -y-1/2, z-1/2'
 
_cell_length_a                    13.351(3)
_cell_length_b                    18.698(4)
_cell_length_c                    13.566(3)
_cell_angle_alpha                 90.00
_cell_angle_beta                  102.84(3)
_cell_angle_gamma                 90.00
_cell_volume                      3301.8(11)
_cell_formula_units_Z             4
_cell_measurement_temperature     133(2)
_cell_measurement_reflns_used     33518
_cell_measurement_theta_min       3.1 
_cell_measurement_theta_max       53.9
 
_exptl_crystal_description        block
_exptl_crystal_colour             yellow
_exptl_crystal_size_max           0.43
_exptl_crystal_size_mid           0.43
_exptl_crystal_size_min           0.27
_exptl_crystal_density_meas       ?
_exptl_crystal_density_diffrn     1.415
_exptl_crystal_density_method     'not measured'
_exptl_crystal_F_000              1440
_exptl_absorpt_coefficient_mu     0.828
_exptl_absorpt_correction_type    numerical
_exptl_absorpt_correction_T_min   0.6654 
_exptl_absorpt_correction_T_max   0.7808
_exptl_absorpt_process_details    'face indexed'
 
_exptl_special_details
;
 ?
;
 
_diffrn_ambient_temperature       133(2)
_diffrn_radiation_wavelength      0.71073
_diffrn_radiation_type            MoK\a
_diffrn_radiation_source          'fine-focus sealed tube'
_diffrn_radiation_monochromator   graphite
_diffrn_measurement_device_type   IPDSII
_diffrn_measurement_method        ?
_diffrn_detector_area_resol_mean  ?
_diffrn_standards_number          ?
_diffrn_standards_interval_count  ?
_diffrn_standards_interval_time   ?
_diffrn_standards_decay_%         ?
_diffrn_reflns_number             32871
_diffrn_reflns_av_R_equivalents   0.0388
_diffrn_reflns_av_sigmaI/netI     0.0220
_diffrn_reflns_limit_h_min        -16
_diffrn_reflns_limit_h_max        17
_diffrn_reflns_limit_k_min        -23
_diffrn_reflns_limit_k_max        23
_diffrn_reflns_limit_l_min        -17
_diffrn_reflns_limit_l_max        17
_diffrn_reflns_theta_min          1.89
_diffrn_reflns_theta_max          26.96
_reflns_number_total              7158
_reflns_number_gt                 6496
_reflns_threshold_expression      >2\s(I)
 
_computing_data_collection        ?
_computing_cell_refinement        ?
_computing_data_reduction         ?
_computing_structure_solution     ?
_computing_structure_refinement   'SHELXL-97 (Sheldrick, 2008)'
_computing_molecular_graphics     ?
_computing_publication_material   ?
 
_refine_special_details
;
 Refinement of F^2^ against ALL reflections.  The weighted R-factor wR and
 goodness of fit S are based on F^2^, conventional R-factors R are based
 on F, with F set to zero for negative F^2^. The threshold expression of
 F^2^ > 2\s(F^2^) is used only for calculating R-factors(gt) etc. and is
 not relevant to the choice of reflections for refinement.  R-factors based
 on F^2^ are statistically about twice as large as those based on F, and R-
 factors based on ALL data will be even larger.
;
 
_refine_ls_structure_factor_coef  Fsqd
_refine_ls_matrix_type            full
_refine_ls_weighting_scheme       calc
_refine_ls_weighting_details
 'calc w=1/[\s^2^(Fo^2^)+(0.0271P)^2^+1.1355P] where P=(Fo^2^+2Fc^2^)/3'
_atom_sites_solution_primary      direct
_atom_sites_solution_secondary    difmap
_atom_sites_solution_hydrogens    geom
_refine_ls_hydrogen_treatment     constr
_refine_ls_extinction_method      none
_refine_ls_extinction_coef        ?
_refine_ls_number_reflns          7158
_refine_ls_number_parameters      398
_refine_ls_number_restraints      0
_refine_ls_R_factor_all           0.0244
_refine_ls_R_factor_gt            0.0205
_refine_ls_wR_factor_ref          0.0526
_refine_ls_wR_factor_gt           0.0513
_refine_ls_goodness_of_fit_ref    1.026
_refine_ls_restrained_S_all       1.026
_refine_ls_shift/su_max           0.003
_refine_ls_shift/su_mean          0.000
 
loop_
 _atom_site_label
 _atom_site_type_symbol
 _atom_site_fract_x
 _atom_site_fract_y
 _atom_site_fract_z
 _atom_site_U_iso_or_equiv
 _atom_site_adp_type
 _atom_site_occupancy
 _atom_site_symmetry_multiplicity
 _atom_site_calc_flag
 _atom_site_refinement_flags
 _atom_site_disorder_assembly
 _atom_site_disorder_group
Sn1 Sn 0.680413(7) 0.079695(5) 0.628929(7) 0.01779(4) Uani 1 1 d . . .
F1 F 0.84887(8) 0.19416(6) 0.80125(8) 0.0372(2) Uani 1 1 d . . .
F2 F 1.02659(9) 0.16982(8) 0.93285(9) 0.0584(4) Uani 1 1 d . . .
F3 F 1.10505(8) 0.03549(9) 0.95880(10) 0.0637(4) Uani 1 1 d . . .
F4 F 0.99826(10) -0.07600(7) 0.85833(10) 0.0572(4) Uani 1 1 d . . .
F5 F 0.82141(10) -0.05227(6) 0.72181(9) 0.0459(3) Uani 1 1 d . . .
N1 N 0.73799(9) 0.16865(7) 0.55273(9) 0.0183(2) Uani 1 1 d . . .
N2 N 0.60674(9) 0.16046(6) 0.70262(8) 0.0177(2) Uani 1 1 d . . .
C1 C 0.88365(12) 0.12586(10) 0.81089(12) 0.0286(3) Uani 1 1 d . . .
C2 C 0.97593(13) 0.11533(12) 0.87973(13) 0.0386(4) Uani 1 1 d . . .
C3 C 1.01467(13) 0.04697(13) 0.89341(14) 0.0432(5) Uani 1 1 d . . .
C4 C 0.96157(14) -0.00887(11) 0.84130(14) 0.0401(5) Uani 1 1 d . . .
C5 C 0.87032(13) 0.00513(10) 0.77281(13) 0.0316(4) Uani 1 1 d . . .
C6 C 0.82849(12) 0.07232(9) 0.75385(11) 0.0243(3) Uani 1 1 d . . .
C7 C 0.77413(11) 0.14518(8) 0.46489(10) 0.0212(3) Uani 1 1 d . . .
C8 C 0.87985(12) 0.13448(8) 0.47215(11) 0.0247(3) Uani 1 1 d . . .
C9 C 0.91061(14) 0.10772(10) 0.38725(13) 0.0330(4) Uani 1 1 d . . .
H9 H 0.9817 0.1008 0.3902 0.040 Uiso 1 1 calc R . .
C10 C 0.84027(15) 0.09115(11) 0.29939(14) 0.0384(4) Uani 1 1 d . . .
H10 H 0.8629 0.0728 0.2428 0.046 Uiso 1 1 calc R . .
C11 C 0.73690(14) 0.10139(11) 0.29397(12) 0.0347(4) Uani 1 1 d . . .
H11 H 0.6888 0.0897 0.2333 0.042 Uiso 1 1 calc R . .
C12 C 0.70161(12) 0.12869(9) 0.37597(11) 0.0253(3) Uani 1 1 d . . .
C13 C 0.96119(12) 0.15015(10) 0.56708(12) 0.0282(3) Uani 1 1 d . . .
H13 H 0.9263 0.1700 0.6191 0.034 Uiso 1 1 calc R . .
C14 C 1.01780(15) 0.08179(11) 0.60964(15) 0.0404(4) Uani 1 1 d . . .
H14A H 0.9677 0.0454 0.6187 0.061 Uiso 1 1 calc R . .
H14B H 1.0639 0.0922 0.6750 0.061 Uiso 1 1 calc R . .
H14C H 1.0580 0.0640 0.5625 0.061 Uiso 1 1 calc R . .
C15 C 1.03881(13) 0.20566(11) 0.54701(14) 0.0365(4) Uani 1 1 d . . .
H15A H 1.0758 0.1864 0.4981 0.055 Uiso 1 1 calc R . .
H15B H 1.0878 0.2167 0.6104 0.055 Uiso 1 1 calc R . .
H15C H 1.0024 0.2494 0.5198 0.055 Uiso 1 1 calc R . .
C16 C 0.58652(12) 0.13910(10) 0.36413(11) 0.0289(3) Uani 1 1 d . . .
H16 H 0.5744 0.1595 0.4286 0.035 Uiso 1 1 calc R . .
C17 C 0.52980(15) 0.06782(11) 0.34488(15) 0.0409(4) Uani 1 1 d . . .
H17A H 0.5400 0.0472 0.2814 0.061 Uiso 1 1 calc R . .
H17B H 0.4563 0.0756 0.3402 0.061 Uiso 1 1 calc R . .
H17C H 0.5567 0.0349 0.4007 0.061 Uiso 1 1 calc R . .
C18 C 0.54380(18) 0.19168(12) 0.27862(15) 0.0478(5) Uani 1 1 d . . .
H18A H 0.5817 0.2369 0.2909 0.072 Uiso 1 1 calc R . .
H18B H 0.4709 0.2004 0.2761 0.072 Uiso 1 1 calc R . .
H18C H 0.5514 0.1714 0.2141 0.072 Uiso 1 1 calc R . .
C19 C 0.77471(13) 0.29228(9) 0.51107(13) 0.0291(3) Uani 1 1 d . . .
H19A H 0.8500 0.2918 0.5290 0.044 Uiso 1 1 calc R . .
H19B H 0.7499 0.3399 0.5240 0.044 Uiso 1 1 calc R . .
H19C H 0.7509 0.2805 0.4393 0.044 Uiso 1 1 calc R . .
C20 C 0.73369(10) 0.23772(8) 0.57417(10) 0.0202(3) Uani 1 1 d . . .
C21 C 0.69179(11) 0.26460(8) 0.65325(11) 0.0212(3) Uani 1 1 d . . .
H21 H 0.7068 0.3133 0.6702 0.025 Uiso 1 1 calc R . .
C22 C 0.63146(11) 0.22994(8) 0.71015(10) 0.0197(3) Uani 1 1 d . . .
C23 C 0.59112(13) 0.27469(9) 0.78545(13) 0.0296(3) Uani 1 1 d . . .
H23A H 0.5159 0.2749 0.7674 0.044 Uiso 1 1 calc R . .
H23B H 0.6167 0.3238 0.7846 0.044 Uiso 1 1 calc R . .
H23C H 0.6146 0.2544 0.8533 0.044 Uiso 1 1 calc R . .
C24 C 0.51874(11) 0.13652(8) 0.73956(11) 0.0198(3) Uani 1 1 d . . .
C25 C 0.53222(11) 0.10030(8) 0.83234(11) 0.0220(3) Uani 1 1 d . . .
C26 C 0.44486(13) 0.07806(9) 0.86437(13) 0.0291(3) Uani 1 1 d . . .
H26 H 0.4526 0.0539 0.9272 0.035 Uiso 1 1 calc R . .
C27 C 0.34735(13) 0.09046(10) 0.80656(14) 0.0337(4) Uani 1 1 d . . .
H27 H 0.2888 0.0756 0.8301 0.040 Uiso 1 1 calc R . .
C28 C 0.33544(12) 0.12459(10) 0.71434(14) 0.0322(4) Uani 1 1 d . . .
H28 H 0.2682 0.1322 0.6744 0.039 Uiso 1 1 calc R . .
C29 C 0.41995(11) 0.14811(9) 0.67868(12) 0.0252(3) Uani 1 1 d . . .
C30 C 0.63779(12) 0.08271(8) 0.89610(11) 0.0240(3) Uani 1 1 d . . .
H30 H 0.6897 0.1096 0.8678 0.029 Uiso 1 1 calc R . .
C31 C 0.66004(12) 0.00281(9) 0.88927(12) 0.0289(3) Uani 1 1 d . . .
H31A H 0.6098 -0.0248 0.9164 0.043 Uiso 1 1 calc R . .
H31B H 0.7294 -0.0076 0.9286 0.043 Uiso 1 1 calc R . .
H31C H 0.6551 -0.0104 0.8184 0.043 Uiso 1 1 calc R . .
C32 C 0.65051(14) 0.10476(10) 1.00734(12) 0.0339(4) Uani 1 1 d . . .
H32A H 0.6350 0.1558 1.0111 0.051 Uiso 1 1 calc R . .
H32B H 0.7214 0.0957 1.0438 0.051 Uiso 1 1 calc R . .
H32C H 0.6033 0.0768 1.0380 0.051 Uiso 1 1 calc R . .
C33 C 0.40257(12) 0.18471(10) 0.57572(12) 0.0313(4) Uani 1 1 d . . .
H33 H 0.4713 0.1943 0.5606 0.038 Uiso 1 1 calc R . .
C34 C 0.34276(18) 0.13666(12) 0.49245(15) 0.0484(5) Uani 1 1 d . . .
H34A H 0.3785 0.0908 0.4933 0.073 Uiso 1 1 calc R . .
H34B H 0.3376 0.1598 0.4267 0.073 Uiso 1 1 calc R . .
H34C H 0.2737 0.1285 0.5037 0.073 Uiso 1 1 calc R . .
C35 C 0.34713(17) 0.25607(11) 0.57523(16) 0.0454(5) Uani 1 1 d . . .
H35A H 0.3377 0.2781 0.5082 0.068 Uiso 1 1 calc R . .
H35B H 0.3881 0.2879 0.6260 0.068 Uiso 1 1 calc R . .
H35C H 0.2799 0.2481 0.5912 0.068 Uiso 1 1 calc R . .
 
loop_
 _atom_site_aniso_label
 _atom_site_aniso_U_11
 _atom_site_aniso_U_22
 _atom_site_aniso_U_33
 _atom_site_aniso_U_23
 _atom_site_aniso_U_13
 _atom_site_aniso_U_12
Sn1 0.01980(6) 0.01621(6) 0.01870(6) -0.00105(3) 0.00714(4) -0.00178(4)
F1 0.0337(5) 0.0303(5) 0.0413(6) 0.0011(4) -0.0055(4) -0.0038(4)
F2 0.0383(6) 0.0780(10) 0.0475(7) 0.0111(6) -0.0147(5) -0.0184(6)
F3 0.0267(5) 0.1102(12) 0.0506(7) 0.0410(8) 0.0010(5) 0.0166(6)
F4 0.0557(7) 0.0613(8) 0.0599(8) 0.0309(6) 0.0246(6) 0.0402(6)
F5 0.0593(7) 0.0283(5) 0.0507(7) 0.0028(5) 0.0133(5) 0.0166(5)
N1 0.0196(5) 0.0202(6) 0.0162(5) 0.0002(4) 0.0067(4) -0.0016(5)
N2 0.0176(5) 0.0191(6) 0.0177(5) 0.0010(4) 0.0066(4) 0.0005(4)
C1 0.0223(7) 0.0376(9) 0.0254(7) 0.0095(7) 0.0041(6) 0.0014(6)
C2 0.0237(8) 0.0600(13) 0.0301(8) 0.0134(8) 0.0015(7) -0.0057(8)
C3 0.0219(8) 0.0753(15) 0.0335(9) 0.0277(10) 0.0086(7) 0.0126(9)
C4 0.0351(9) 0.0515(12) 0.0390(9) 0.0240(9) 0.0196(8) 0.0236(9)
C5 0.0319(8) 0.0366(9) 0.0303(8) 0.0089(7) 0.0154(7) 0.0097(7)
C6 0.0213(7) 0.0299(8) 0.0234(7) 0.0069(6) 0.0086(6) 0.0039(6)
C7 0.0277(7) 0.0198(7) 0.0190(6) 0.0012(5) 0.0115(6) -0.0018(6)
C8 0.0280(7) 0.0248(8) 0.0246(7) 0.0015(6) 0.0133(6) -0.0019(6)
C9 0.0337(9) 0.0374(9) 0.0342(9) -0.0028(7) 0.0207(7) -0.0003(7)
C10 0.0460(10) 0.0471(11) 0.0289(8) -0.0093(8) 0.0227(8) -0.0026(8)
C11 0.0410(9) 0.0430(10) 0.0225(8) -0.0079(7) 0.0119(7) -0.0060(8)
C12 0.0304(8) 0.0264(8) 0.0209(7) -0.0007(6) 0.0097(6) -0.0026(6)
C13 0.0230(7) 0.0382(9) 0.0262(7) 0.0008(7) 0.0115(6) 0.0005(7)
C14 0.0359(9) 0.0511(12) 0.0384(10) 0.0123(8) 0.0173(8) 0.0099(8)
C15 0.0281(8) 0.0481(11) 0.0360(9) -0.0034(8) 0.0128(7) -0.0069(8)
C16 0.0291(8) 0.0374(9) 0.0193(7) -0.0037(6) 0.0037(6) 0.0001(7)
C17 0.0327(9) 0.0510(12) 0.0373(10) -0.0099(8) 0.0044(8) -0.0093(8)
C18 0.0574(12) 0.0518(13) 0.0320(9) 0.0037(9) 0.0052(9) 0.0147(10)
C19 0.0369(9) 0.0215(8) 0.0332(8) 0.0045(6) 0.0172(7) -0.0019(7)
C20 0.0193(6) 0.0208(7) 0.0205(6) 0.0019(5) 0.0043(5) -0.0017(5)
C21 0.0241(7) 0.0175(7) 0.0225(6) -0.0013(5) 0.0065(5) -0.0006(6)
C22 0.0197(6) 0.0199(7) 0.0191(6) -0.0015(5) 0.0035(5) 0.0013(5)
C23 0.0360(8) 0.0254(8) 0.0319(8) -0.0080(6) 0.0170(7) -0.0038(7)
C24 0.0194(6) 0.0201(7) 0.0217(7) -0.0028(5) 0.0087(5) -0.0012(5)
C25 0.0235(7) 0.0210(7) 0.0235(7) -0.0009(6) 0.0093(6) -0.0008(6)
C26 0.0314(8) 0.0300(8) 0.0299(8) 0.0032(6) 0.0153(7) -0.0031(7)
C27 0.0256(8) 0.0378(10) 0.0432(10) 0.0025(7) 0.0192(7) -0.0031(7)
C28 0.0202(7) 0.0390(10) 0.0391(9) 0.0022(7) 0.0099(6) 0.0023(7)
C29 0.0211(7) 0.0287(8) 0.0271(7) 0.0009(6) 0.0080(6) 0.0028(6)
C30 0.0262(7) 0.0283(8) 0.0179(7) 0.0029(6) 0.0059(6) -0.0031(6)
C31 0.0291(8) 0.0315(9) 0.0250(7) 0.0031(6) 0.0037(6) 0.0027(7)
C32 0.0416(9) 0.0389(10) 0.0214(7) -0.0023(7) 0.0073(7) -0.0059(8)
C33 0.0205(7) 0.0436(10) 0.0291(8) 0.0082(7) 0.0043(6) 0.0042(7)
C34 0.0605(13) 0.0489(12) 0.0323(9) -0.0029(9) 0.0031(9) 0.0095(10)
C35 0.0528(11) 0.0367(11) 0.0436(10) 0.0083(9) 0.0041(9) 0.0056(9)
 
_geom_special_details
;
 All s.u.'s (except the s.u. in the dihedral angle between two l.s. planes)
 are estimated using the full covariance matrix.  The cell s.u.'s are taken
 into account individually in the estimation of s.u.'s in distances, angles
 and torsion angles; correlations between s.u.'s in cell parameters are only
 used when they are defined by crystal symmetry.  An approximate (isotropic)
 treatment of cell s.u.'s is used for estimating s.u.'s involving l.s. planes.
;
 
loop_
 _geom_bond_atom_site_label_1
 _geom_bond_atom_site_label_2
 _geom_bond_distance
 _geom_bond_site_symmetry_2
 _geom_bond_publ_flag
Sn1 N2 2.1643(12) . ?
Sn1 N1 2.1861(12) . ?
Sn1 C6 2.3044(17) . ?
F1 C1 1.355(2) . ?
F2 C2 1.341(2) . ?
F3 C3 1.347(2) . ?
F4 C4 1.348(2) . ?
F5 C5 1.362(2) . ?
N1 C20 1.3278(19) . ?
N1 C7 1.4494(18) . ?
N2 C22 1.3388(19) . ?
N2 C24 1.4468(18) . ?
C1 C6 1.375(2) . ?
C1 C2 1.385(2) . ?
C2 C3 1.376(3) . ?
C3 C4 1.367(3) . ?
C4 C5 1.383(2) . ?
C5 C6 1.376(2) . ?
C7 C12 1.403(2) . ?
C7 C8 1.407(2) . ?
C8 C9 1.398(2) . ?
C8 C13 1.517(2) . ?
C9 C10 1.379(3) . ?
C10 C11 1.379(3) . ?
C11 C12 1.397(2) . ?
C12 C16 1.522(2) . ?
C13 C14 1.531(2) . ?
C13 C15 1.533(2) . ?
C16 C17 1.526(3) . ?
C16 C18 1.531(3) . ?
C19 C20 1.510(2) . ?
C20 C21 1.408(2) . ?
C21 C22 1.393(2) . ?
C22 C23 1.509(2) . ?
C24 C25 1.405(2) . ?
C24 C29 1.409(2) . ?
C25 C26 1.395(2) . ?
C25 C30 1.517(2) . ?
C26 C27 1.382(3) . ?
C27 C28 1.382(3) . ?
C28 C29 1.394(2) . ?
C29 C33 1.526(2) . ?
C30 C31 1.530(2) . ?
C30 C32 1.537(2) . ?
C33 C34 1.523(3) . ?
C33 C35 1.525(3) . ?
 
loop_
 _geom_angle_atom_site_label_1
 _geom_angle_atom_site_label_2
 _geom_angle_atom_site_label_3
 _geom_angle
 _geom_angle_site_symmetry_1
 _geom_angle_site_symmetry_3
 _geom_angle_publ_flag
N2 Sn1 N1 86.05(5) . . ?
N2 Sn1 C6 96.07(5) . . ?
N1 Sn1 C6 93.38(5) . . ?
C20 N1 C7 120.86(12) . . ?
C20 N1 Sn1 126.84(10) . . ?
C7 N1 Sn1 112.01(9) . . ?
C22 N2 C24 118.63(12) . . ?
C22 N2 Sn1 125.64(9) . . ?
C24 N2 Sn1 115.56(9) . . ?
F1 C1 C6 120.18(13) . . ?
F1 C1 C2 115.68(16) . . ?
C6 C1 C2 124.13(17) . . ?
F2 C2 C3 120.25(16) . . ?
F2 C2 C1 121.43(19) . . ?
C3 C2 C1 118.32(19) . . ?
F3 C3 C4 120.3(2) . . ?
F3 C3 C2 119.5(2) . . ?
C4 C3 C2 120.24(16) . . ?
F4 C4 C3 119.69(17) . . ?
F4 C4 C5 121.6(2) . . ?
C3 C4 C5 118.74(18) . . ?
F5 C5 C6 119.71(15) . . ?
F5 C5 C4 116.31(16) . . ?
C6 C5 C4 123.97(18) . . ?
C1 C6 C5 114.54(15) . . ?
C1 C6 Sn1 129.42(12) . . ?
C5 C6 Sn1 116.01(12) . . ?
C12 C7 C8 121.24(13) . . ?
C12 C7 N1 118.76(13) . . ?
C8 C7 N1 119.84(13) . . ?
C9 C8 C7 117.83(15) . . ?
C9 C8 C13 118.84(14) . . ?
C7 C8 C13 123.33(13) . . ?
C10 C9 C8 121.60(16) . . ?
C9 C10 C11 119.75(16) . . ?
C10 C11 C12 121.24(16) . . ?
C11 C12 C7 118.33(15) . . ?
C11 C12 C16 118.28(14) . . ?
C7 C12 C16 123.39(13) . . ?
C8 C13 C14 111.04(15) . . ?
C8 C13 C15 111.38(13) . . ?
C14 C13 C15 109.61(14) . . ?
C12 C16 C17 110.93(15) . . ?
C12 C16 C18 111.08(15) . . ?
C17 C16 C18 110.12(15) . . ?
N1 C20 C21 123.90(13) . . ?
N1 C20 C19 119.61(13) . . ?
C21 C20 C19 116.49(14) . . ?
C22 C21 C20 129.24(14) . . ?
N2 C22 C21 124.91(13) . . ?
N2 C22 C23 118.07(13) . . ?
C21 C22 C23 117.02(13) . . ?
C25 C24 C29 121.08(13) . . ?
C25 C24 N2 120.47(13) . . ?
C29 C24 N2 118.41(13) . . ?
C26 C25 C24 118.23(14) . . ?
C26 C25 C30 119.53(14) . . ?
C24 C25 C30 122.21(13) . . ?
C27 C26 C25 121.36(15) . . ?
C28 C27 C26 119.71(15) . . ?
C27 C28 C29 121.38(16) . . ?
C28 C29 C24 118.20(15) . . ?
C28 C29 C33 119.27(14) . . ?
C24 C29 C33 122.52(14) . . ?
C25 C30 C31 110.20(13) . . ?
C25 C30 C32 112.81(14) . . ?
C31 C30 C32 109.92(13) . . ?
C34 C33 C35 109.80(15) . . ?
C34 C33 C29 111.24(16) . . ?
C35 C33 C29 111.79(15) . . ?
 
_diffrn_measured_fraction_theta_max    0.997
_diffrn_reflns_theta_full              26.96
_diffrn_measured_fraction_theta_full   0.997
_refine_diff_density_max    0.429
_refine_diff_density_min   -0.307
_refine_diff_density_rms    0.048
